# Supplementary material for: Growth and setting of gas bubbles in a viscoelastic matrix imaged by X-ray microtomography: the evolution of cellular structures in fermenting wheat flour dough
Source: Royal Society of Chemistry journal article supplement (doi:10.1039/c5sm00100e), 2015-01-01
Supplement: c5sm00100e1.pdf [file c5sm00100e1.pdf]

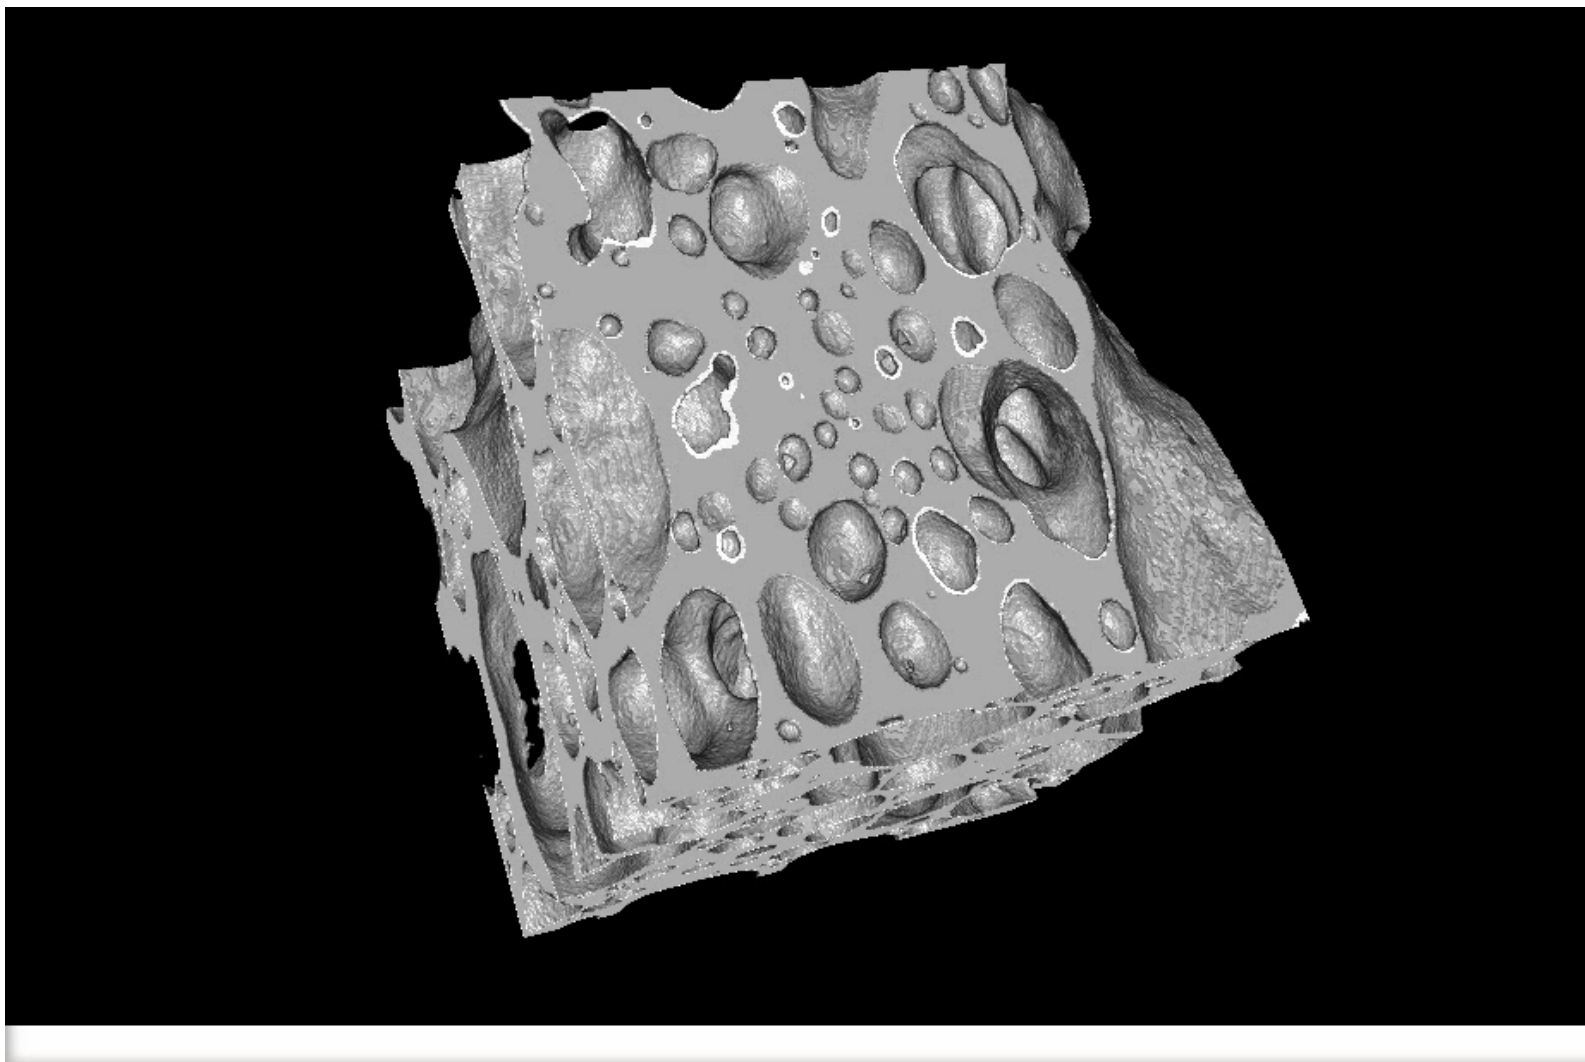

Panoramic movie of the 3D cellular structure of wheat flour dough element ( $0.125 \text{ cm}^3$ ) after 3 h fermentation by Xray tomography (ESRF Grenoble, voxel  $= (5\mu\text{m})^3$ ).
